# Supplementary material for: New tetranuclear manganese clusters with [MnII3MnIII] and [MnII2MnIII2] metallic cores exhibiting low and high spin ground state
Source: Royal Society of Chemistry journal article supplement (doi:10.1039/c5dt04869a), 2016-01-01
Supplement: c5dt04869a1.pdf [file c5dt04869a1.pdf]

## **New tetranuclear manganese clusters with [MnII<sub>3</sub>MnIII] and [MnII<sub>2</sub>MnIII<sub>2</sub>] metallic cores exhibiting the low and high spin ground state**

M. Sobocińska,<sup>a\*</sup> M. Antkowiak,<sup>b</sup> M. Wojciechowski,<sup>c</sup> G. Kamieniarz,<sup>b</sup> J. Utko<sup>a</sup> and T. Lis<sup>a</sup>

<sup>a</sup> Faculty of Chemistry, University of Wrocław, Joliot-Curie 14, 50-383, Wrocław, Poland

<sup>b</sup> Faculty of Physics, A. Mickiewicz University, Umultowska 85, 61-614, Poznań, Poland

<sup>c</sup> Institute of Physics, University of Zielona Góra, Szafrana 4a, 65-516 Zielona Góra, Poland

\* Correspondence e-mail: maria.sobocinska@chem.uni.wroc.pl

### **Electronic Supplementary Information (ESI)**

#### **Table of content**

|                               |    |
|-------------------------------|----|
| 1. Supplementary tables.....  | 2  |
| 2. Supplementary figures..... | 9  |
| 3. Crystal structures.....    | 15 |
| 4. Computational details..... | 17 |

## 1. Supplementary tables

**Table S1.** Crystallographic data for complexes: 1 and 2.

|                                                            | Complex 1                                                                           | Complex 2                                                                       |
|------------------------------------------------------------|-------------------------------------------------------------------------------------|---------------------------------------------------------------------------------|
| Empirical formula                                          | C <sub>98</sub> H <sub>96</sub> ClMn <sub>4</sub> N <sub>1.60</sub> O <sub>16</sub> | C <sub>18</sub> H <sub>42</sub> Cl <sub>4</sub> Mn <sub>4</sub> O <sub>12</sub> |
| Formula weight [g/mol]                                     | 1807.37                                                                             | 812.07                                                                          |
| Crystal system, space group                                | Monoclinic, <i>P2<sub>1</sub>/n</i>                                                 | Monoclinic, <i>P2<sub>1</sub>/c</i>                                             |
| Temperature [K]                                            | 100(2)                                                                              | 100(2)                                                                          |
| Wavelength [Å]                                             | 0.71073                                                                             | 0.71073                                                                         |
| Unit cell dimensions                                       |                                                                                     |                                                                                 |
| <i>a</i> , <i>b</i> , <i>c</i> [Å]                         | 22.483(5), 14.057(3), 29.614(6)                                                     | 11.252(3), 13.134(4), 11.161(3)                                                 |
| $\beta$ [°]                                                | 111.74(2)                                                                           | 105.16(2)                                                                       |
| Volume [Å <sup>3</sup> ]                                   | 8694(3)                                                                             | 1592.0(8)                                                                       |
| <i>Z</i>                                                   | 4                                                                                   | 2                                                                               |
| Crystal size [mm]                                          | 0.57 x 0.42 x 0.39                                                                  | 0.15 x 0.14 x 0.07                                                              |
| Reflections collected                                      | 59724                                                                               | 17276                                                                           |
| Independent reflections                                    | 20876                                                                               | 4717                                                                            |
| Reflections observed ( <i>I</i> > 2σ( <i>I</i> ))          | 15370                                                                               | 3868                                                                            |
| Absorption correction                                      | Analytical                                                                          | Analytical                                                                      |
| Absorption coefficient [mm <sup>-1</sup> ]                 | 0.67                                                                                | 1.96                                                                            |
| Data / restraints / parameters                             | 20876 / 0 / 1126                                                                    | 4717 / 0 / 175                                                                  |
| <i>R</i> <sub>int</sub>                                    | 0.040                                                                               | 0.035                                                                           |
| (sin θ/λ) <sub>max</sub> (Å <sup>-1</sup> )                | 0.674                                                                               | 0.727                                                                           |
| No. of reflections                                         | 20876                                                                               | 4717                                                                            |
| No. of parameters                                          | 1126                                                                                | 175                                                                             |
| Δρ <sub>max</sub> , Δρ <sub>min</sub> (e Å <sup>-3</sup> ) | 0.76, -0.45                                                                         | 0.66, -0.51                                                                     |

The highest residual electron density of 0.76 e Å<sup>-3</sup> was located 0.06 Å from Mn2 for the complex **1**, whereas in the complex **2** the highest residual electron density of 0.66 e Å<sup>-3</sup> was located 0.73 Å from Cl2.

**Table S2.** Selected interatomic distances [Å] for complex **1**.

|         |            |         |            |
|---------|------------|---------|------------|
| Mn1⋯Mn4 | 3.1698(9)  | Mn2–O1A | 2.2617(15) |
| Mn1⋯Mn2 | 3.1761(7)  | Mn2–O2M | 2.2948(15) |
| Mn1⋯Mn3 | 3.2064(7)  | Mn2–Cl  | 2.3931(7)  |
| Mn1–O1M | 1.8643(14) | Mn3–O1D | 2.0828(15) |
| Mn1–O1O | 1.8756(14) | Mn3–O2C | 2.0932(14) |
| Mn1–O2A | 1.9731(14) | Mn3–O1O | 2.2419(14) |
| Mn1–O1P | 2.0092(14) | Mn3–O1P | 2.2581(14) |
| Mn1–O1C | 2.1368(14) | Mn3–N1  | 2.2855(19) |
| Mn1–O1N | 2.2567(14) | Mn3–O2O | 2.3709(15) |
| Mn3⋯Mn4 | 3.6275(8)  | Mn3–O2P | 2.5553(6)  |
| Mn2⋯Mn4 | 3.7107(8)  | Mn4–O2B | 2.0443(15) |
| Mn2⋯Mn3 | 5.987(1)   | Mn4–O2D | 2.0725(14) |
| Mn2–O1M | 2.1683(14) | Mn4–O1N | 2.1070(14) |
| Mn2–O1N | 2.1716(14) | Mn4–O1P | 2.1662(14) |
| Mn2–O1B | 2.2070(15) | Mn4–O2N | 2.2374(15) |

**Table S3.** Bond valence sums (BVS) for manganese atoms in complex **1**.

| Atom | Mn(II) | Mn(III) | Mn(IV) |
|------|--------|---------|--------|
| Mn1  | 3.34   | 3.10    | 3.04   |
| Mn2  | 2.10   | 1.87    | 1.80   |
| Mn3  | 2.00   | 1.76    | 1.70   |
| Mn4  | 2.04   | 1.80    | 1.75   |

**Table S4.** Hydrogen-bond geometry in complex **1**.

| D–H $\cdots$ A                      | D–H [Å] | H $\cdots$ A [Å] | D $\cdots$ A [Å] | <(D–H $\cdots$ A) [°] |
|-------------------------------------|---------|------------------|------------------|-----------------------|
| C3O–H3O1 $\cdots$ N1                | 0.98    | 2.58             | 3.224(3)         | 123.5                 |
| C2G–H2G $\cdots$ O2C                | 0.95    | 2.32             | 2.986(3)         | 126.5                 |
| C2K–H2K $\cdots$ O2D                | 0.95    | 2.30             | 2.953(3)         | 127.5                 |
| C6C–H6C $\cdots$ O1A                | 0.95    | 2.34             | 3.007(3)         | 126.5                 |
| C3P–H3P1 $\cdots$ N1                | 0.98    | 2.66             | 3.264(3)         | 119.9                 |
| C2R–H2R2 $\cdots$ Cl <sup>ii</sup>  | 0.98    | 2.87             | 3.532(3)         | 125.7                 |
| C2R–H2R2 $\cdots$ O1A <sup>ii</sup> | 0.98    | 2.63             | 3.475(3)         | 144.5                 |

Symmetry code: (ii) x, 1 + y, z.

**Table S5.** Geometry of C–H $\cdots\pi$  interaction in complex **1**.

| C–H $\cdots\pi$                   | H $\cdots$ Cg [Å] | C $\cdots$ Cg [Å] | <(C–H $\cdots$ Cg) [°] |
|-----------------------------------|-------------------|-------------------|------------------------|
| C4L–H4L $\cdots$ Cg1 <sup>i</sup> | 2.97              | 3.59              | 140                    |

Symmetry code: (i) 0.5 – x, –0.5 + y, 0.5 – z.

Centroid of aromatic ring: Cg1: [C1J/C2J/C3J/C4J/C5J/C6J].

**Table S6.** Selected interatomic distances [Å] for complex **2**.

|                               |            |                      |            |
|-------------------------------|------------|----------------------|------------|
| Mn1 $\cdots$ Mn1 <sup>i</sup> | 3.2380(9)  | Mn1–O2C <sup>i</sup> | 2.2820(13) |
| Mn1 $\cdots$ Mn2              | 3.3447(9)  | Mn2–O1A              | 2.1177(13) |
| Mn1–O1B                       | 1.8840(12) | Mn2–O1B <sup>i</sup> | 2.1332(12) |
| Mn1–O1A                       | 1.8925(12) | Mn2–O2B <sup>i</sup> | 2.2941(13) |
| Mn1–O1C <sup>i</sup>          | 2.0127(12) | Mn2–O2A              | 2.3313(14) |
| Mn1–O1C                       | 2.2341(12) | Mn2–O1C              | 2.3442(12) |
| Mn1–Cl1                       | 2.2642(7)  | Mn2–Cl2              | 2.3755(7)  |

Symmetry code: (i) –x + 1, –y + 1, –z + 1

**Table S7.** Bond valence sums (BVS) for manganese atoms in complex **2**.

| Atom | Mn(II) | Mn(III) | Mn(IV) |
|------|--------|---------|--------|
| Mn1  | 3.27   | 3.08    | 3.02   |
| Mn2  | 2.06   | 1.88    | 1.78   |

**Table S8.** Hydrogen-bond geometry in complex **2**.

| D–H···A                      | D–H [Å] | H···A [Å] | D···A [Å]  | <(D–H···A) [°] |
|------------------------------|---------|-----------|------------|----------------|
| C1A–H1A1···Cl1 <sup>ii</sup> | 0.99    | 2.83      | 3.761(2)   | 157.0          |
| C1A–H1A2···O2C <sup>i</sup>  | 0.99    | 2.51      | 3.094(2)   | 117.6          |
| C2A–H2A1···Cl1               | 0.99    | 2.79      | 3.4758(19) | 126.6          |
| C3A–H3A2···Cl2               | 0.98    | 2.77      | 3.441(2)   | 126.1          |
| C1B–H1B2···Cl1               | 0.99    | 2.67      | 3.2134(19) | 115.0          |
| C1C–H1C2···O1A <sup>i</sup>  | 0.99    | 2.51      | 2.999(2)   | 110.3          |
| C2C–H2C2···Cl2               | 0.99    | 2.68      | 3.548(2)   | 146.8          |

Symmetry codes: (i)  $-x + 1, -y + 1, -z + 1$ ; (ii)  $-x + 1, y - 0.5, -z + 1.5$ .

**Table S9.** The DFT total energies calculated of **1** without the SO interaction. Energy is related to the lowest value.  $M_{\text{tot}}$  is the total magnetic moment of a single molecule. The symbols  $\pm$  correspond to spin orientation of manganese ions at specific positions, i.e.  $+ - + -$  means that Mn1 spin is “up”, Mn2 spin is “down”, Mn3 spin is “up” and Mn4 spin is “down”.

| spin configuration           | ++++  | --+-   | -+++  | +--+  |
|------------------------------|-------|--------|-------|-------|
| E (meV)                      | 124.3 | 73.2   | 53.7  | 0.0   |
| $M_{\text{tot}}$ ( $\mu_B$ ) | 19.00 | -11.00 | 9.00  | -1.00 |
| Mn1 ( $\mu_B$ )              | 4.42  | -4.42  | -4.39 | 4.39  |
| Mn2 ( $\mu_B$ )              | 4.45  | -4.44  | 4.43  | -4.42 |
| Mn3 ( $\mu_B$ )              | 3.63  | 3.54   | 3.61  | 3.56  |
| Mn4 ( $\mu_B$ )              | 4.46  | -4.45  | 4.45  | -4.44 |

**Table S10.** The DFT total energies of **1** calculated with the SO interaction taken into account. Energy is related to the lowest value. Quantization axis is expressed in basis of cell vectors (Miller index notation).  $M_{\text{tot}}$  is the total magnetic moment of a single molecule. The symbols  $\pm$  correspond to spin orientation of manganese ions at specific positions, i.e.  $+ - + -$  means that Mn1 spin is “up”, Mn2 spin is “down”, Mn3 spin is “up” and Mn4 spin is “down”.

| quantization axis            | (0 0 1) |       | (0 1 0) |       | (1 0 0) |       |
|------------------------------|---------|-------|---------|-------|---------|-------|
| spin configuration           | ++++    | +--+  | ++++    | +--+  | ++++    | +--+  |
| E (meV)                      | 124.4   | 0.0   | 124.7   | 0.3   | 125.3   | 0.9   |
| $M_{\text{tot}}$ ( $\mu_B$ ) | 19.00   | -1.00 | 19.00   | -1.00 | 19.00   | -1.00 |
| Mn1 ( $\mu_B$ )              | 4.42    | 4.39  | 4.42    | 4.39  | 4.42    | 4.39  |
| Mn2 ( $\mu_B$ )              | 4.45    | -4.42 | 4.45    | -4.42 | 4.45    | -4.42 |
| Mn3 ( $\mu_B$ )              | 3.63    | 3.56  | 3.63    | 3.56  | 3.63    | 3.56  |
| Mn4 ( $\mu_B$ )              | 4.46    | -4.44 | 4.46    | -4.44 | 4.46    | -4.44 |

**Table S11.** Precise electric charges and magnetic moments of **1** obtained without the SO interaction (see chapter **Computational details**). The symbols  $\pm$  correspond to spin orientation of manganese ions at specific positions, i.e.  $+-+-$  means that Mn1 spin is “up”, Mn2 spin is “down”, Mn3 spin is “up” and Mn4 spin is “down”.

| spin configuration    | atomic sphere | $Q_{\text{up}}$ (e) | $Q_{\text{down}}$ (e) | $Q_{\text{tot}}$ (e) | $M$ ( $\mu_B$ ) |
|-----------------------|---------------|---------------------|-----------------------|----------------------|-----------------|
| ++++<br>ferromagnetic | Mn1           | 13.876346           | 9.456615              | 23.332961            | 4.419731        |
|                       | Mn2           | 13.853849           | 9.404693              | 23.258542            | 4.449156        |
|                       | Mn3           | 13.620033           | 9.985053              | 23.605086            | 3.634980        |
|                       | Mn4           | 13.854931           | 9.391738              | 23.246668            | 4.463193        |
| --+-                  | Mn1           | 9.458237            | 13.875541             | 23.333777            | -4.417304       |
|                       | Mn2           | 9.409145            | 13.849112             | 23.258258            | -4.439967       |
|                       | Mn3           | 13.573043           | 10.036758             | 23.609801            | 3.536285        |
|                       | Mn4           | 9.397902            | 13.849282             | 23.247184            | -4.451380       |
| -+++                  | Mn1           | 9.474713            | 13.862113             | 23.336825            | -4.387400       |
|                       | Mn2           | 13.847015           | 9.412073              | 23.259088            | 4.434942        |
|                       | Mn3           | 13.606567           | 9.997704              | 23.604271            | 3.608863        |
|                       | Mn4           | 13.849835           | 9.397308              | 23.247143            | 4.452527        |
| +-+-<br>ferrimagnetic | Mn1           | 13.862614           | 9.473344              | 23.335959            | 4.389270        |
|                       | Mn2           | 9.416738            | 13.841633             | 23.258371            | -4.424895       |
|                       | Mn3           | 13.586615           | 10.023602             | 23.610217            | 3.563013        |
|                       | Mn4           | 9.403742            | 13.84429              | 23.248032            | -4.440548       |

**Table S12.** Precise electric charges and magnetic moments of **1** obtained with the SO interaction taken into account (see chapter **Computational details**). The symbols  $\pm$  correspond to spin orientation of manganese ions at specific positions, i.e.  $+-+-$  means that Mn1 spin is “up”, Mn2 spin is “down”, Mn3 spin is “up” and Mn4 spin is “down”.

| spin<br>configuration /<br>quantization<br>axis | atomic sphere | $Q_{\text{up}}$ (e) | $Q_{\text{down}}$ (e) | $Q_{\text{tot}}$ (e)<br>$Q_{\text{up}} + Q_{\text{down}}$ | $M$ ( $\mu_B$ )<br>$Q_{\text{up}} - Q_{\text{down}}$ |
|-------------------------------------------------|---------------|---------------------|-----------------------|-----------------------------------------------------------|------------------------------------------------------|
| ++++<br>(0 0 1)                                 | Mn1           | 13.875728           | 9.457283              | 23.333011                                                 | 4.418445                                             |
|                                                 | Mn2           | 13.853166           | 9.405287              | 23.258453                                                 | 4.447879                                             |
|                                                 | Mn3           | 13.618793           | 9.986325              | 23.605117                                                 | 3.632468                                             |
|                                                 | Mn4           | 13.854405           | 9.392304              | 23.246708                                                 | 4.462101                                             |
| +-+-<br>(0 0 1)                                 | Mn1           | 13.861987           | 9.474026              | 23.336014                                                 | 4.387961                                             |
|                                                 | Mn2           | 9.417246            | 13.841059             | 23.258305                                                 | -4.423813                                            |
|                                                 | Mn3           | 13.585368           | 10.024818             | 23.610185                                                 | 3.560550                                             |
|                                                 | Mn4           | 9.404363            | 13.843668             | 23.248031                                                 | -4.439305                                            |
| ++++<br>(0 1 0)                                 | Mn1           | 13.87574            | 9.457272              | 23.333013                                                 | 4.418468                                             |
|                                                 | Mn2           | 13.853155           | 9.405294              | 23.258449                                                 | 4.447861                                             |
|                                                 | Mn3           | 13.618848           | 9.986275              | 23.605122                                                 | 3.632573                                             |
|                                                 | Mn4           | 13.854448           | 9.392258              | 23.246705                                                 | 4.462190                                             |
| +-+-<br>(0 1 0)                                 | Mn1           | 13.862000           | 9.474017              | 23.336017                                                 | 4.387983                                             |
|                                                 | Mn2           | 9.417265            | 13.841026             | 23.258292                                                 | -4.423761                                            |
|                                                 | Mn3           | 13.585439           | 10.024756             | 23.610195                                                 | 3.560683                                             |
|                                                 | Mn4           | 9.404323            | 13.843700             | 23.248023                                                 | -4.439377                                            |
| ++++<br>(1 0 0)                                 | Mn1           | 13.875776           | 9.457227              | 23.333003                                                 | 4.418549                                             |
|                                                 | Mn2           | 13.853151           | 9.405296              | 23.258447                                                 | 4.447855                                             |
|                                                 | Mn3           | 13.619049           | 9.986075              | 23.605123                                                 | 3.632974                                             |
|                                                 | Mn4           | 13.854459           | 9.392245              | 23.246704                                                 | 4.462214                                             |
| +-+-<br>(1 0 0)                                 | Mn1           | 13.862039           | 9.473966              | 23.336005                                                 | 4.388073                                             |
|                                                 | Mn2           | 9.417255            | 13.841044             | 23.258300                                                 | -4.423789                                            |
|                                                 | Mn3           | 13.585645           | 10.024544             | 23.610189                                                 | 3.561101                                             |
|                                                 | Mn4           | 9.404316            | 13.843709             | 23.248024                                                 | -4.439393                                            |



## 2. Supplementary figures

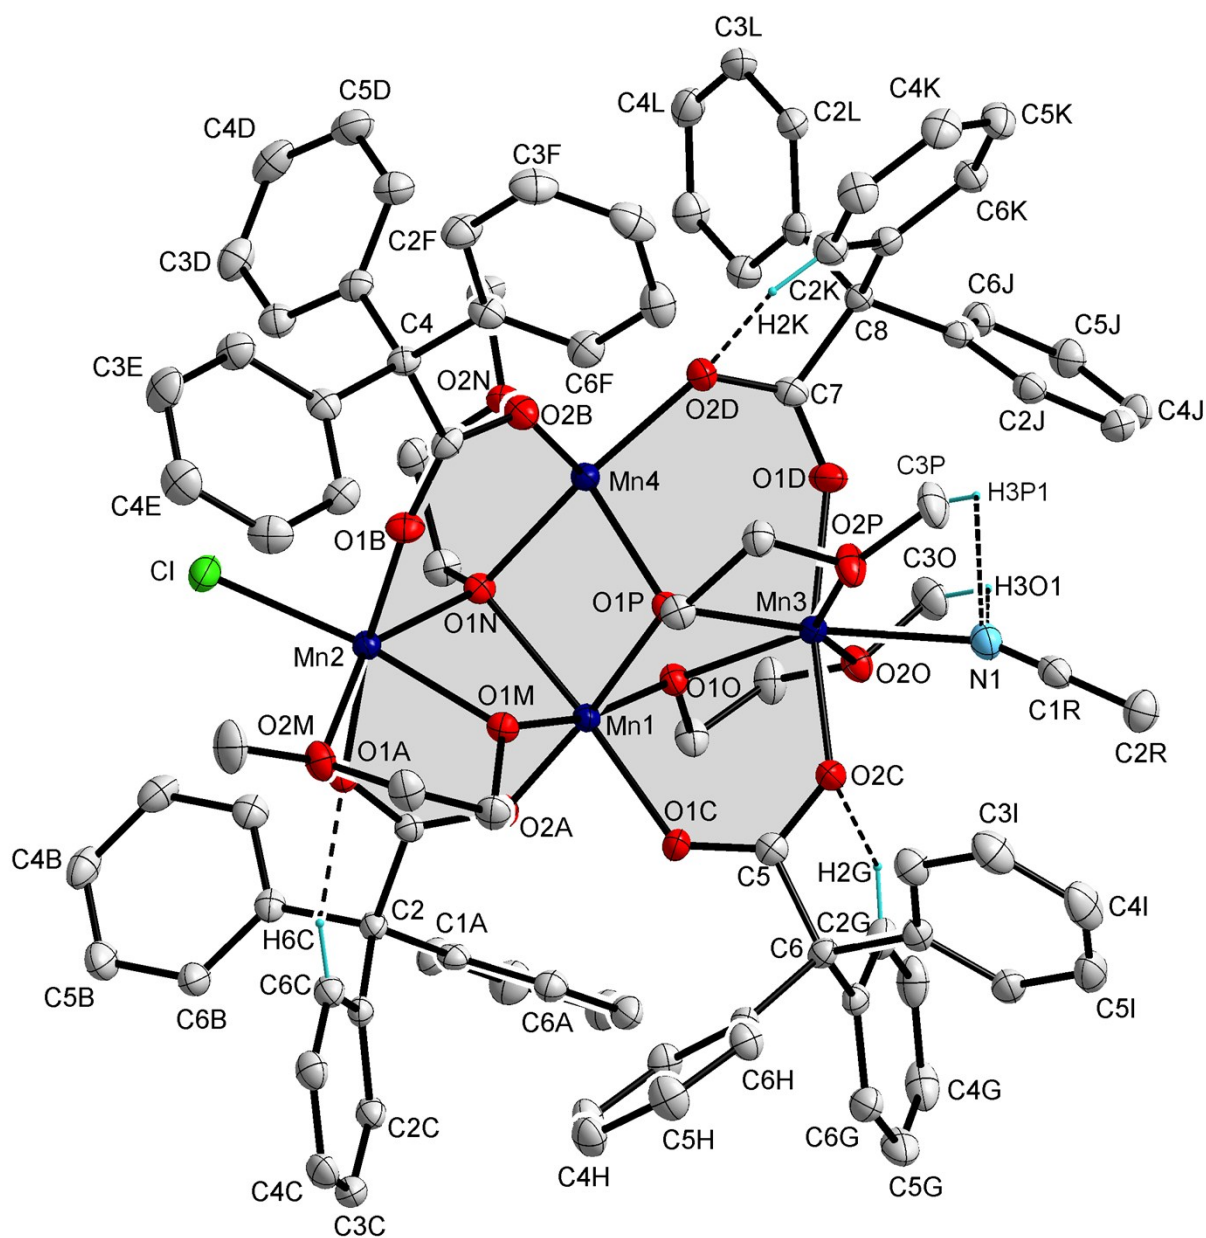

**Figure S1.** Intramolecular hydrogen bonds drawn with dashed lines in the molecular structure of complex **1**. H atoms not involved in hydrogen bonds have been omitted for clarity.

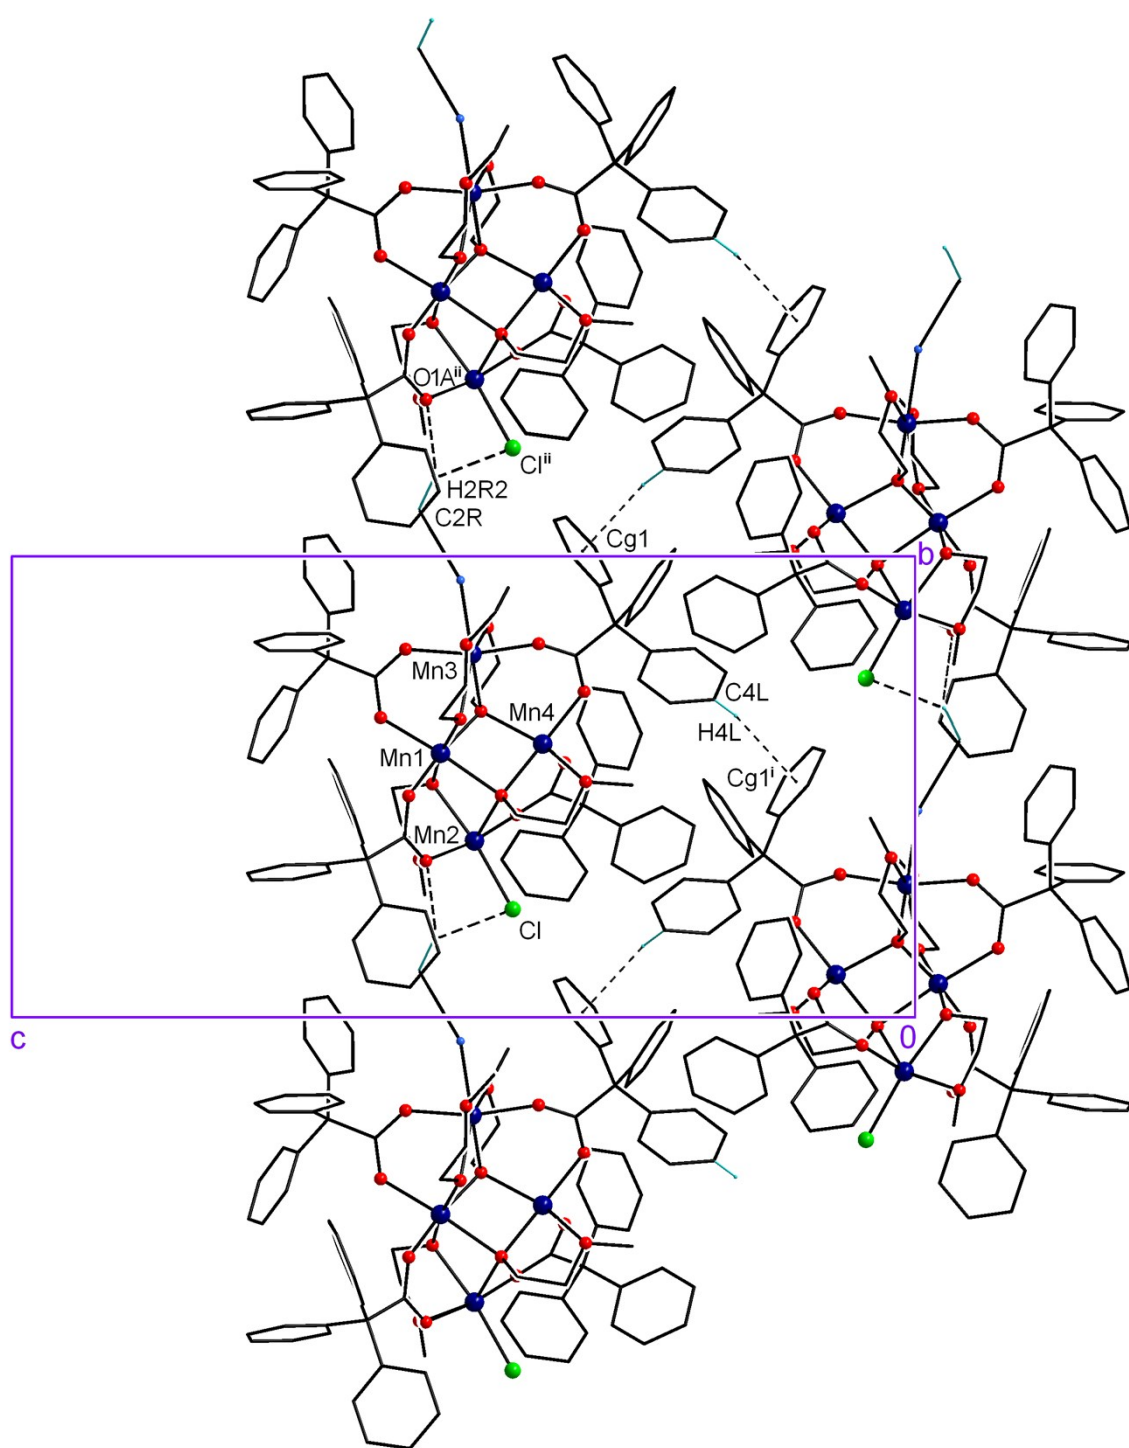

**Figure S2.** Double chain spreads along *b*-axis. Symmetry codes: (i)  $0.5 - x, -0.5 + y, 0.5 - z$ , (ii)  $x, 1 + y, z$ . Centroid of aromatic ring: Cg1: [C1J/C2J/C3J/C4J/C5J/C6J]. Intramolecular hydrogen bonds have been omitted for clarity.

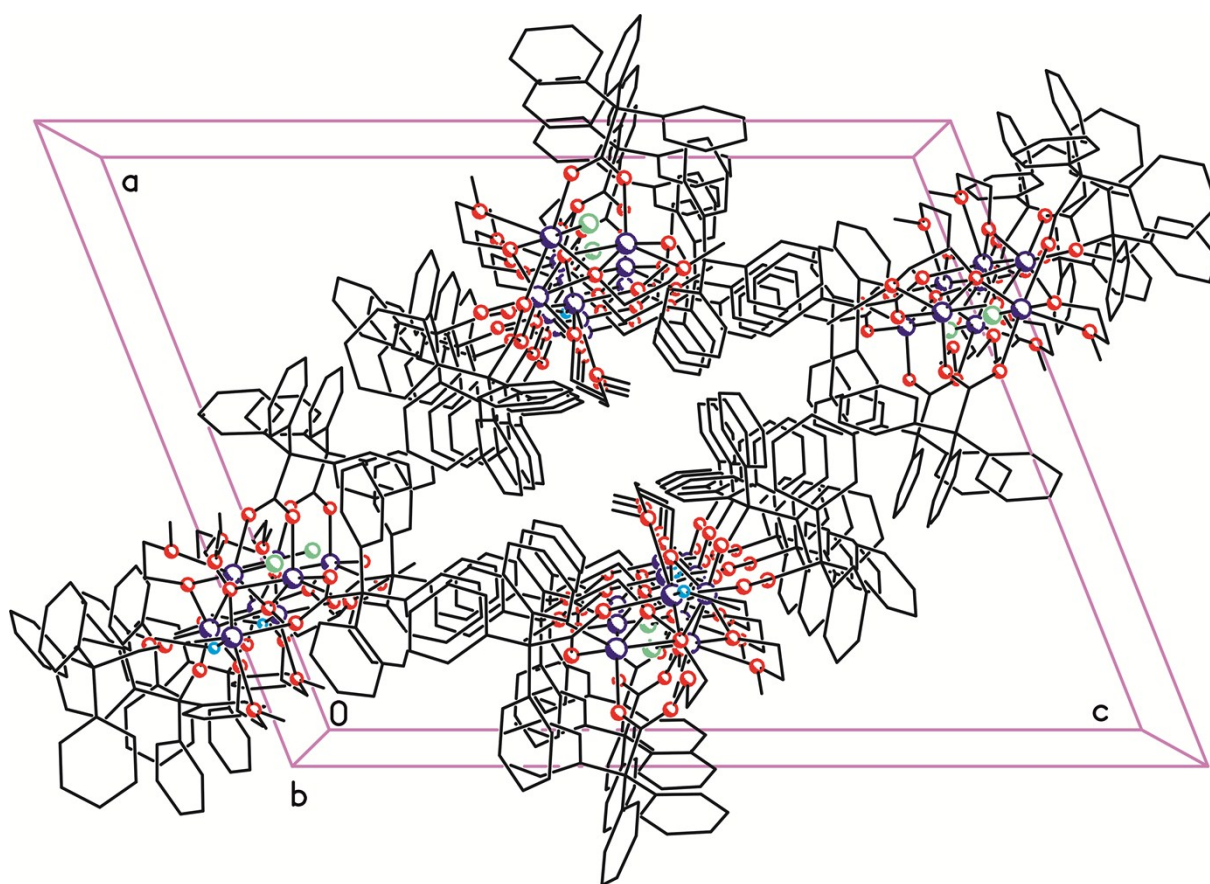

**Figure S3.** Layer architecture in **1**; viewed down *b*-axis. Hydrogen atoms have been omitted for clarity. Intra- and intermolecular interactions are not shown in this picture.

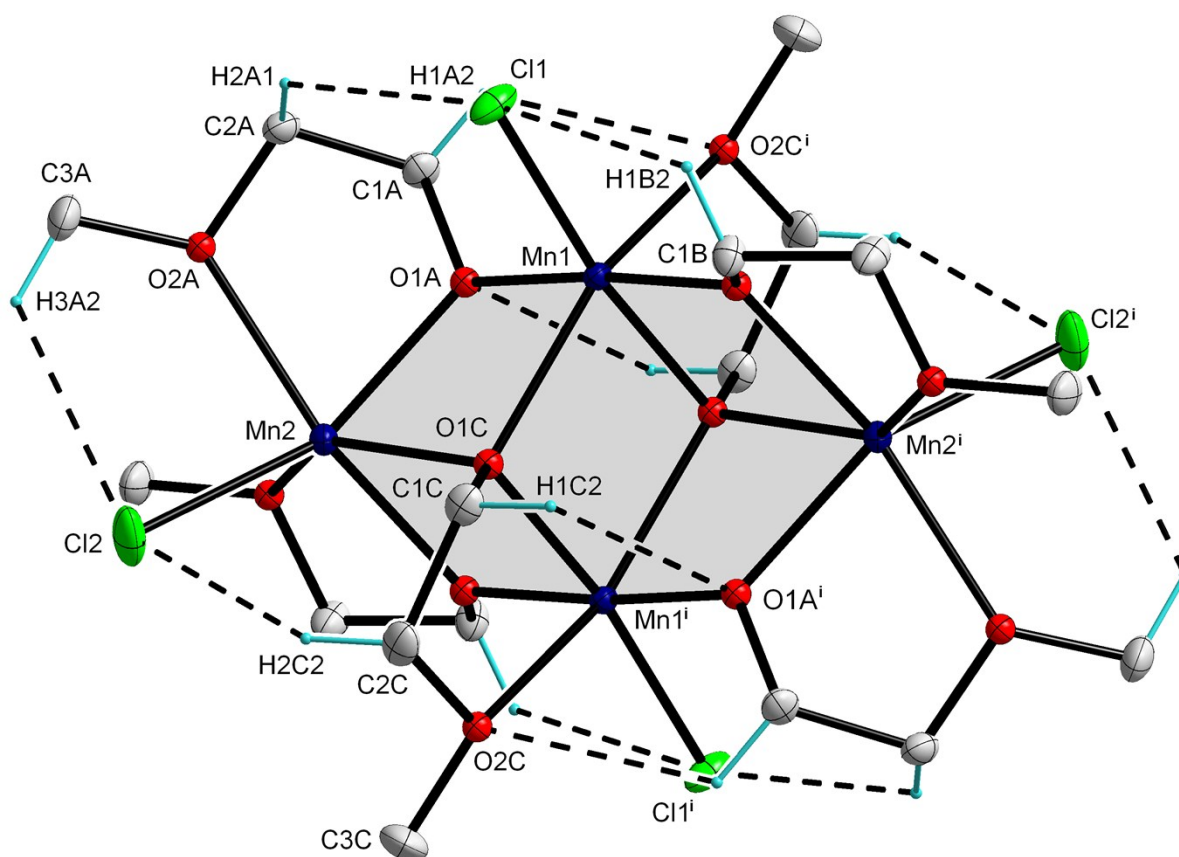

**Figure S4.** Intramolecular hydrogen bonds drawn with dashed lines in the molecular structure of complex **2**. H atoms not involved in hydrogen bonds have been omitted for clarity.

Symmetry code: (i) 1 - x, 1 - y, 1 - z.

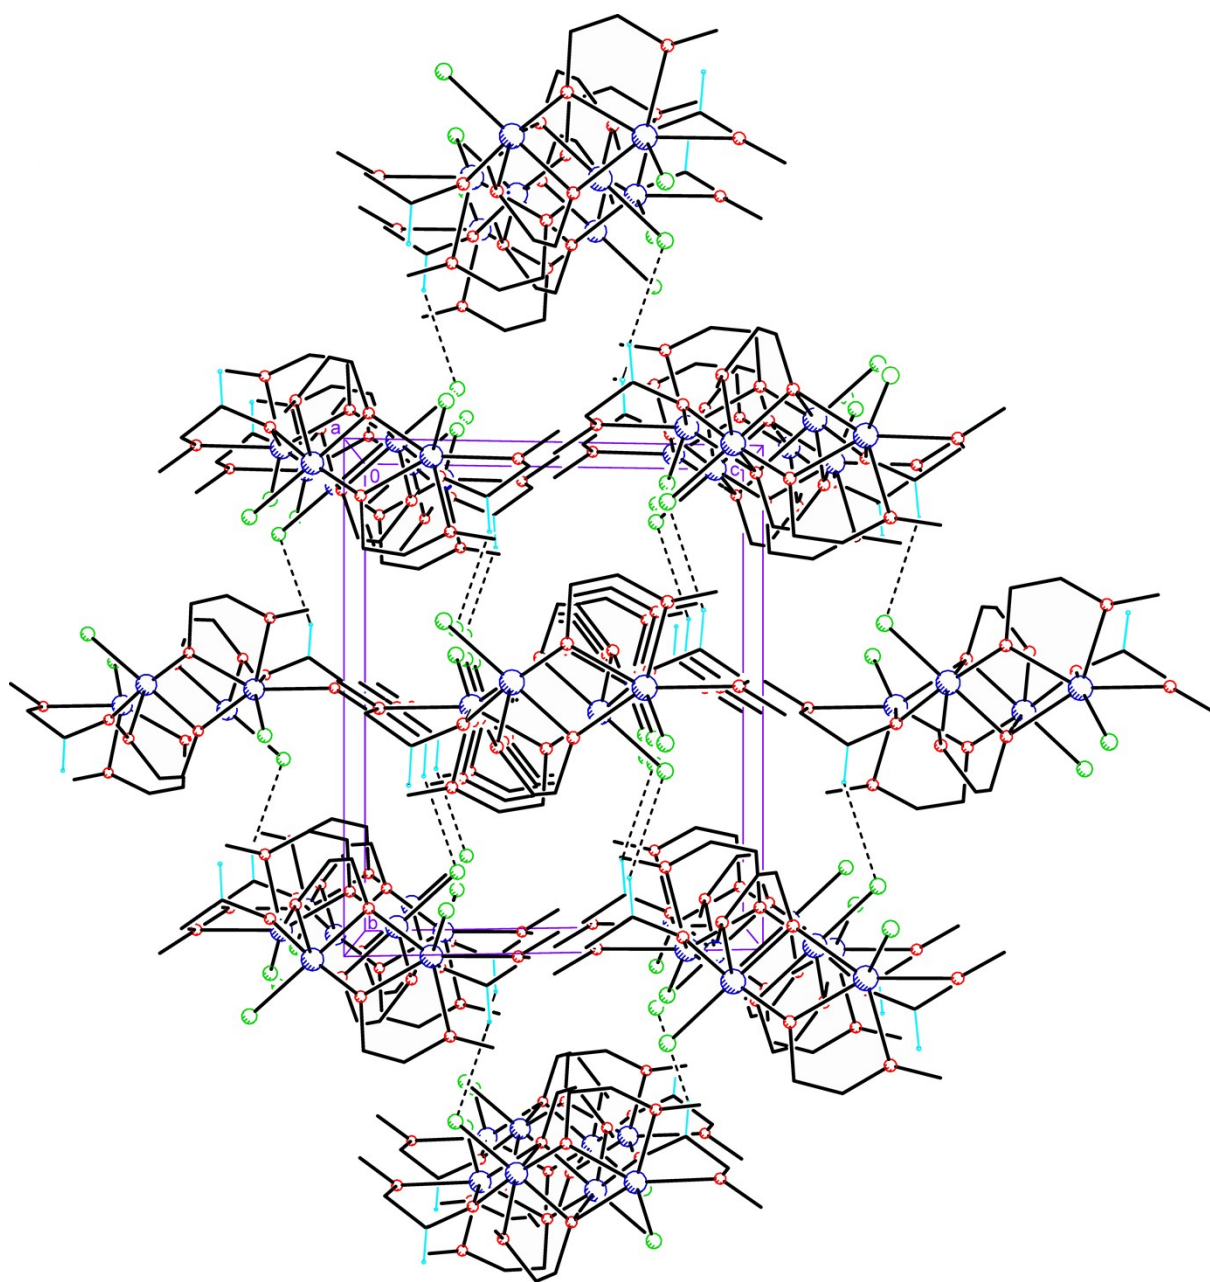

**Figure S5.** Layer architecture in **2**; viewed down *a*-axis. H atoms not involved in hydrogen bonding have been omitted. Dashed lines represent C–H $\cdots$ Cl hydrogen bonds between adjacent molecules.



### 3. Crystal Structures

#### H-bonding and C–H $\cdots$ $\pi$ interactions in complex 1

Structure of the complex has twofold character: presence of oxygen atoms within the molecule causes hydrophilic interior surrounded by hydrophobic sphere build up from triphenylacetate ligands. This leads to a creation of intramolecular hydrogen bonds of type C–H $\cdots$ O and C–H $\cdots$ N (nitrogen atom comes from coordinated CH<sub>3</sub>CN molecule). The first type occurs between carbon atom of phenyl ring and oxygen atom of carboxylate arm from the same triphenylacetate ligand. The second type is observed between carbon atom of methyl group of 2-methoxyethanolate ligand and nitrogen atom of acetonitrile coordinated to the same manganese centre. In this case nitrogen atom participates as an acceptor in two specific interactions composing bifurcated hydrogen bond. These intramolecular hydrogen bonds are shown in Fig. S1. Crystal packing is dictated by C–H $\cdots$ Cl, C–H $\cdots$ O hydrogen bonding as well as C–H $\cdots$  $\pi$  interactions. Hydrogen atom H2R2 belonged to methyl group of coordinated acetonitrile is involved in interactions with two electronegative atoms of adjacent molecule, generating bifurcated hydrogen bond. In one case, terminal chlorine atom bonded to Mn(II) centre, plays a role of H-acceptor, while in the second case, this function is assigned to oxygen atom O1A of the carboxylic ligand also bonded to the same manganese ion, giving the separation between two acceptors of 3.352(2) Å. Intermolecular hydrogen bonds and C–H $\cdots$  $\pi$  interactions cause the formation of double-chain architecture that is extended along *[010]* direction (Fig. S2). Crystal packing is shown in Fig. S3. Geometric parameters of intra- and intermolecular hydrogen bonds are shown in Table S3, whereas Table S4 contains geometric parameters of intermolecular C–H $\cdots$  $\pi$  interaction.

## H-bonding in complex **2**

Electronegative atoms such as oxygen and chlorine atoms, and carbon atoms present in the complex may display H-donor behavior. Within the compound **2** the bifurcated hydrogen bonds are observed (Figure S4). Every chlorine atom interacts specifically with two hydrogen atoms coming from two different 2-methoxyethanolate ligands bonded to the same manganese ion as chlorine atom. In the molecule there are also existing C–H $\cdots$ O interactions between atoms of various ligands. Crystal structure of **2** is stabilized by C–H $\cdots$ Cl hydrogen bonds created between adjacent molecules (Figure S5). Carbon atom of 2-methoxyethanolate ligand acts as a H-donor, while chlorine atom of neighbouring molecule is an acceptor. Geometric parameters of intra- and intermolecular hydrogen bonds are listed in Table S7.

#### 4. Computational details

For both compounds **1** and **2** the DFT calculations were performed using all electron linearized augmented plane wave (LAPW) method<sup>1,2</sup> implemented in WIEN2k computational package<sup>3,4,5</sup>. We account for the exchange and correlation effects using the generalized gradient approximation (GGA) as implemented in Perdew, Burke and Ernzerhof (PBE) functional<sup>6</sup>. The parameters defining the basis set are GMAX = 20 and RKMAX = 3.0 for **1** and RKMAX = 2.5 for **2**.

Within WIEN2k the core and valence states are treated separately. In our calculations we define manganese core states as those from argon configuration (1s, 2s, 2p, 3s and 3p). This leaves us with the states 3d and 4s which are considered valence. Core states are treated fully relativistically<sup>7</sup>. Relativistic effects are also included for valence electrons by scalar relativistic treatment when no spin-orbit (SO) interaction is present<sup>8</sup> or with the second variational method when SO coupling is included<sup>9</sup>.

The LAPW method incorporates muffin-tin radii (RMT) approximation<sup>10</sup>. According to this approximation around each atom in the structure there is a spherical area called atomic sphere. All electrons within atomic spheres are considered to belong to atoms around which those spheres are described. Atomic spheres cannot overlap and cannot be too small, so that the core electrons do not “leak out”. This is very important, because within atomic spheres electrons are described with wave functions that can be expressed as a product of spherically symmetrical radial function  $R(r)$  and spherical harmonics  $Y_{lm}$ . Area outside atomic spheres is called interstitial region and all electrons in it are described with plain wave functions. The values of the RMT parameters which have been chosen for different elements are the same for both compounds, i.e. 2.27, 2.00, 1.24, 1.15, 1.00 and 0.83 Bohrs for Mn, Cl, O, N, C and H, respectively.

In terms of electronic density, WIEN2k considers two of them - one for spin channel “up” and one for spin channel “down”. Quite self explanatory, the “up” density is generated for those electrons which spin is oriented “up” and “down” density is for those electrons, for which spin projection is “down”. Through integration of these densities (expressed in units of  $e/\text{Bohr}^3$ ) for specific atoms within appropriate atomic spheres one can calculate electric charges (expressed in units of  $e$ ). By integrating “up” and “down” densities we obtain  $Q_{\text{up}}$  and  $Q_{\text{down}}$  charges. Total electric charges  $Q_{\text{tot}}$  are obtained by summing the result ( $Q_{\text{tot}} = Q_{\text{up}} + Q_{\text{down}}$ ). In a similar fashion magnetic moments  $M$  (expressed in units of  $\mu_B$ ) can be calculated



as a difference of charges ( $M = Q_{\text{up}} - Q_{\text{down}}$ ). Precise values of  $Q_{\text{up}}$ ,  $Q_{\text{down}}$ ,  $Q_{\text{tot}}$  and  $M$  for manganese in complex **1** are presented in table S10 and S11.

For complex **1** the so called “hydrogen saturation” was performed<sup>11,12</sup>. Each  $\text{C}(\text{C}_6\text{H}_5)_3$  group in the bridges between manganese ions was replaced with single hydrogen atom. The lengths of C-H bonds for these hydrogen atoms were set to 0.99 Å. This action does not change the electronic and magnetic properties of the compound, however it speeds up calculations by reducing the number of atoms in a cell and consequently number of electrons. For complex **2** no modification of the structure was performed.

<sup>1</sup> O.K. Andersen, Phys. Rev. B **12**, 3060 (1975)

<sup>2</sup> D.J. Singh, **Planewaves Pseudopotentials and the LAPW Method**, Kluwer Academic Publishers (1994)

<sup>3</sup> P. Blaha, K. Schwarz, G.H.K. Madsen, D. Kvasnicka, J. Luitz, **WIEN2k, An Augmented Plane Wave + Local Orbitals Program for Calculating Crystal Properties**, Karlheinz Schwarz, Techn. Universität Wien (1999)

<sup>4</sup> E. Sjöstedt, L. Nordström, D.J. Singh, Solid State Commun. **114**, 15 (2000)

<sup>5</sup> G.K.H. Madsen, P. Blaha, K. Schwarz, E. Sjöstedt, L. Nordström, Phys. Rev. B **64**, 195134 (2001)

<sup>6</sup> J.P. Perdew, K. Burke, M. Ernzerhof, Phys. Rev. Lett. **77**, 3865 (1996)

<sup>7</sup> J.P. Desclaux, Comp. Phys. Commun. **1**, 216 (1969)

<sup>8</sup> D.D. Koelling, B.N. Harmon, J. Phys. C: Sol. St. Phys. **10**, 3107 (1977)

<sup>9</sup> A.H. MacDonald, W.E. Pickett, D.D. Koelling, J. Phys. C **13**, 2675 (1980)

<sup>10</sup> J.C. Slater, Phys. Rev. **51**, 846 (1937)

<sup>11</sup> T. Ślusarski, B. Brzostowski, D. Tomecka, G. Kamieniarz, J. Nanosci. Nanotechnol. **11**, 9080 (2011)

<sup>12</sup> V. Bellini, A. Olivieri, F. Manghi, Phys. Rev. B **73**, 184431 (2006)
